# Supplementary material
Source: ML conference proceedings conference paper supplement (https://proceedings.mlr.press/v97/engstrom19a.html)
Supplement: Supplementary file [file engstrom19a-supp.pdf]

## A. Omitted Tables and Figures

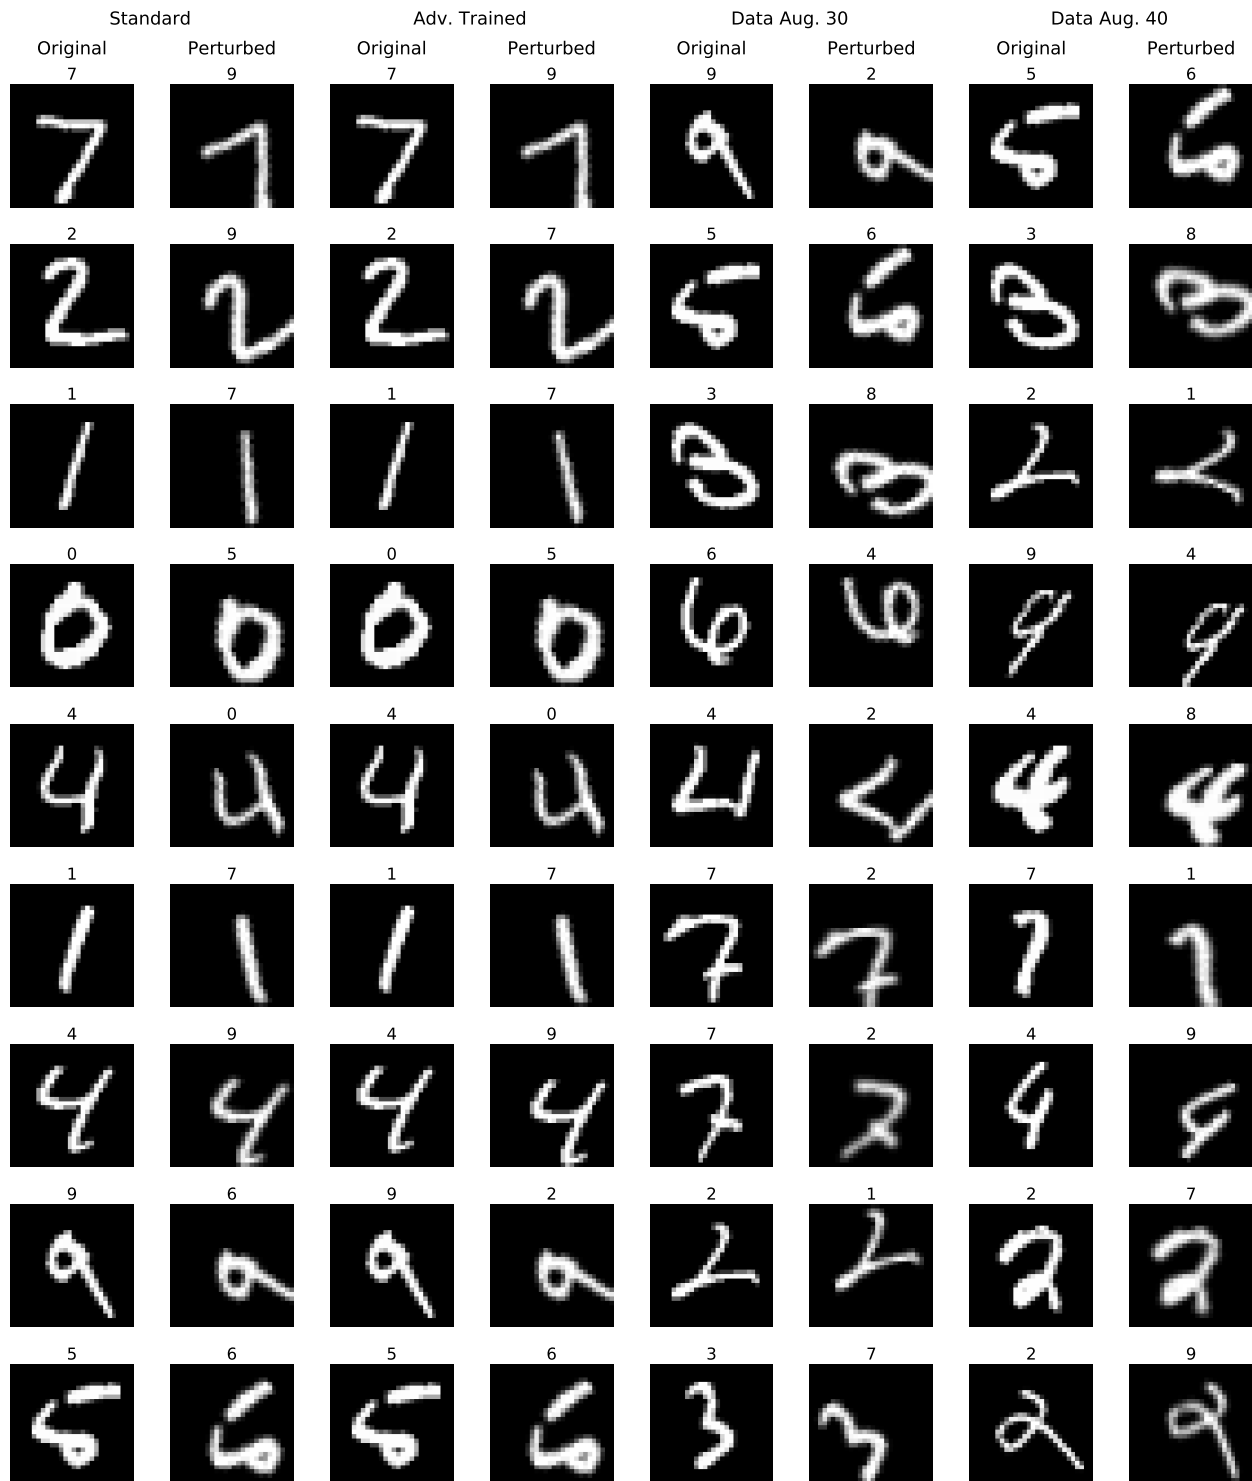

Figure 5. MNIST. Successful adversarial examples for the models studied in Section 5. Rotations are restricted to be within  $30^\circ$  of the original image and translations up to 3 pixels per direction (image size  $28 \times 28$ ). Each example is visualized along with its predicted label in the original and perturbed versions.

## Exploring the Landscape of Spatial Robustness

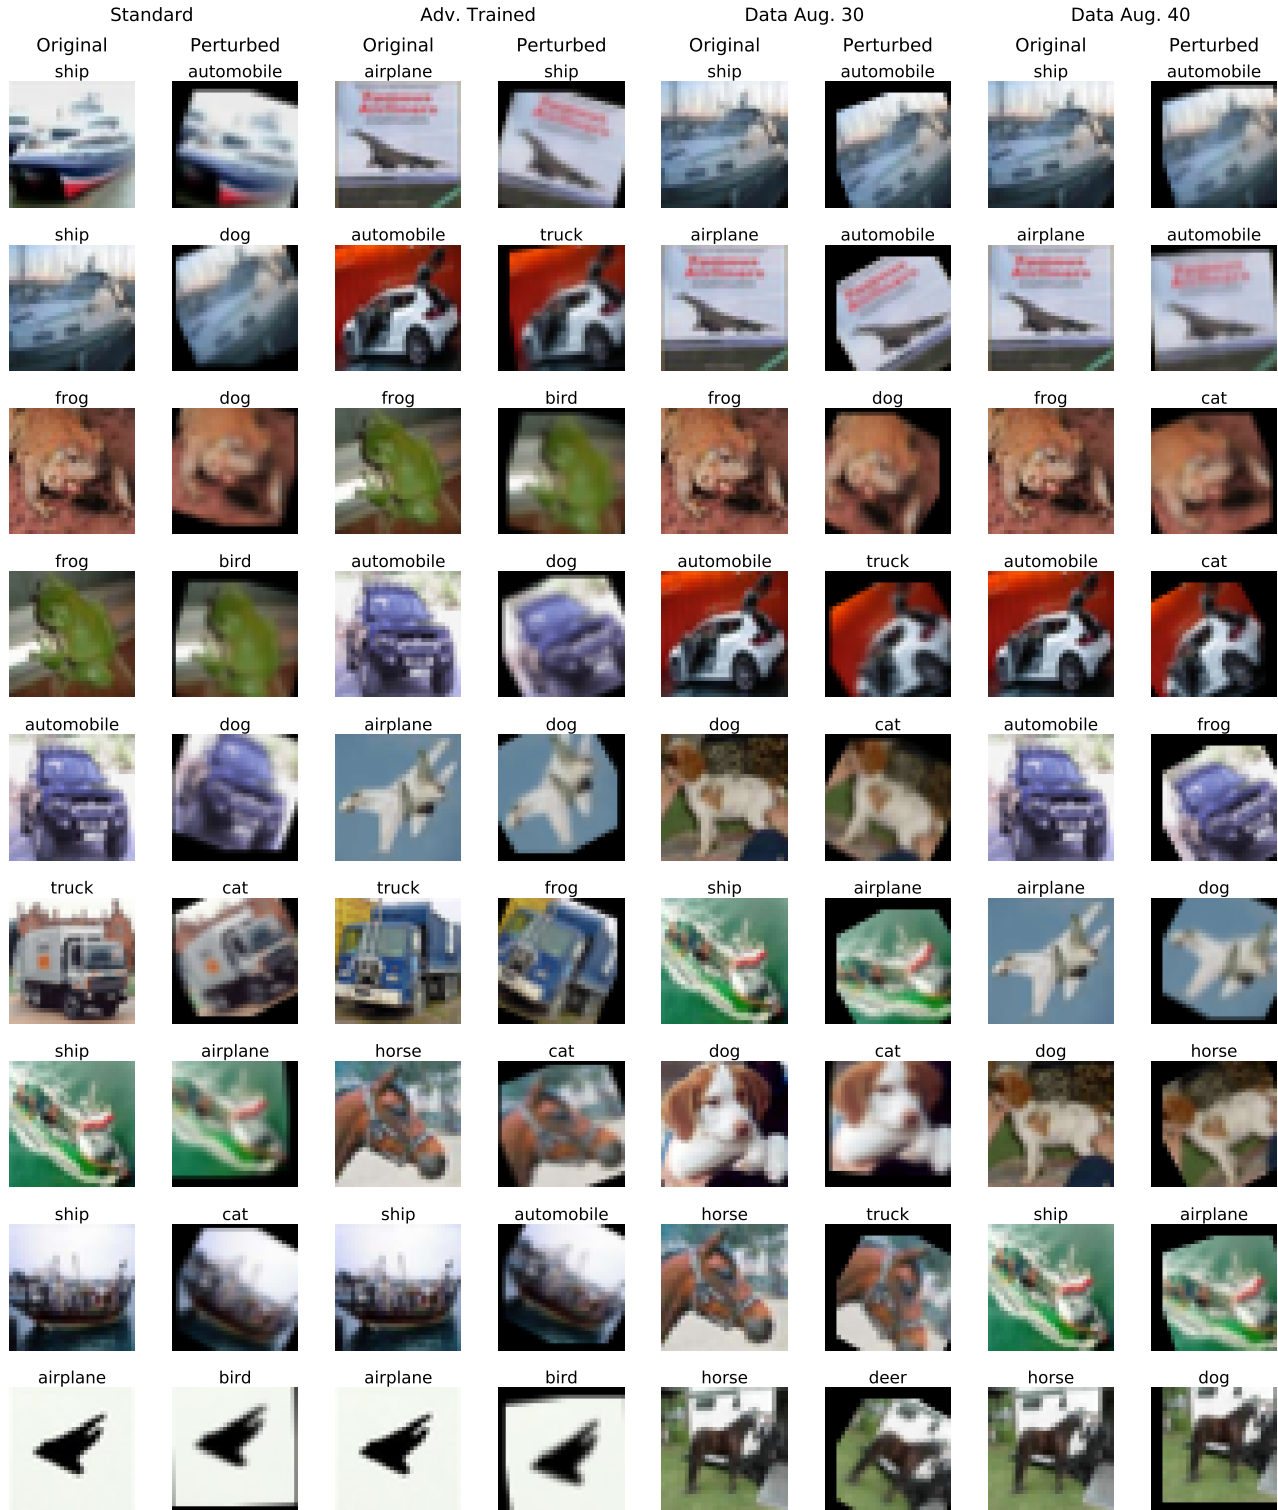

Figure 6. CIFAR10. Successful adversarial examples for the models studied in Section 5. Rotations are restricted to be within  $30^\circ$  of the original and translations up to 3 pixels per directions (image size  $32 \times 32$ ). Each example is visualized along with its predicted label in the original and perturbed version.

## Exploring the Landscape of Spatial Robustness

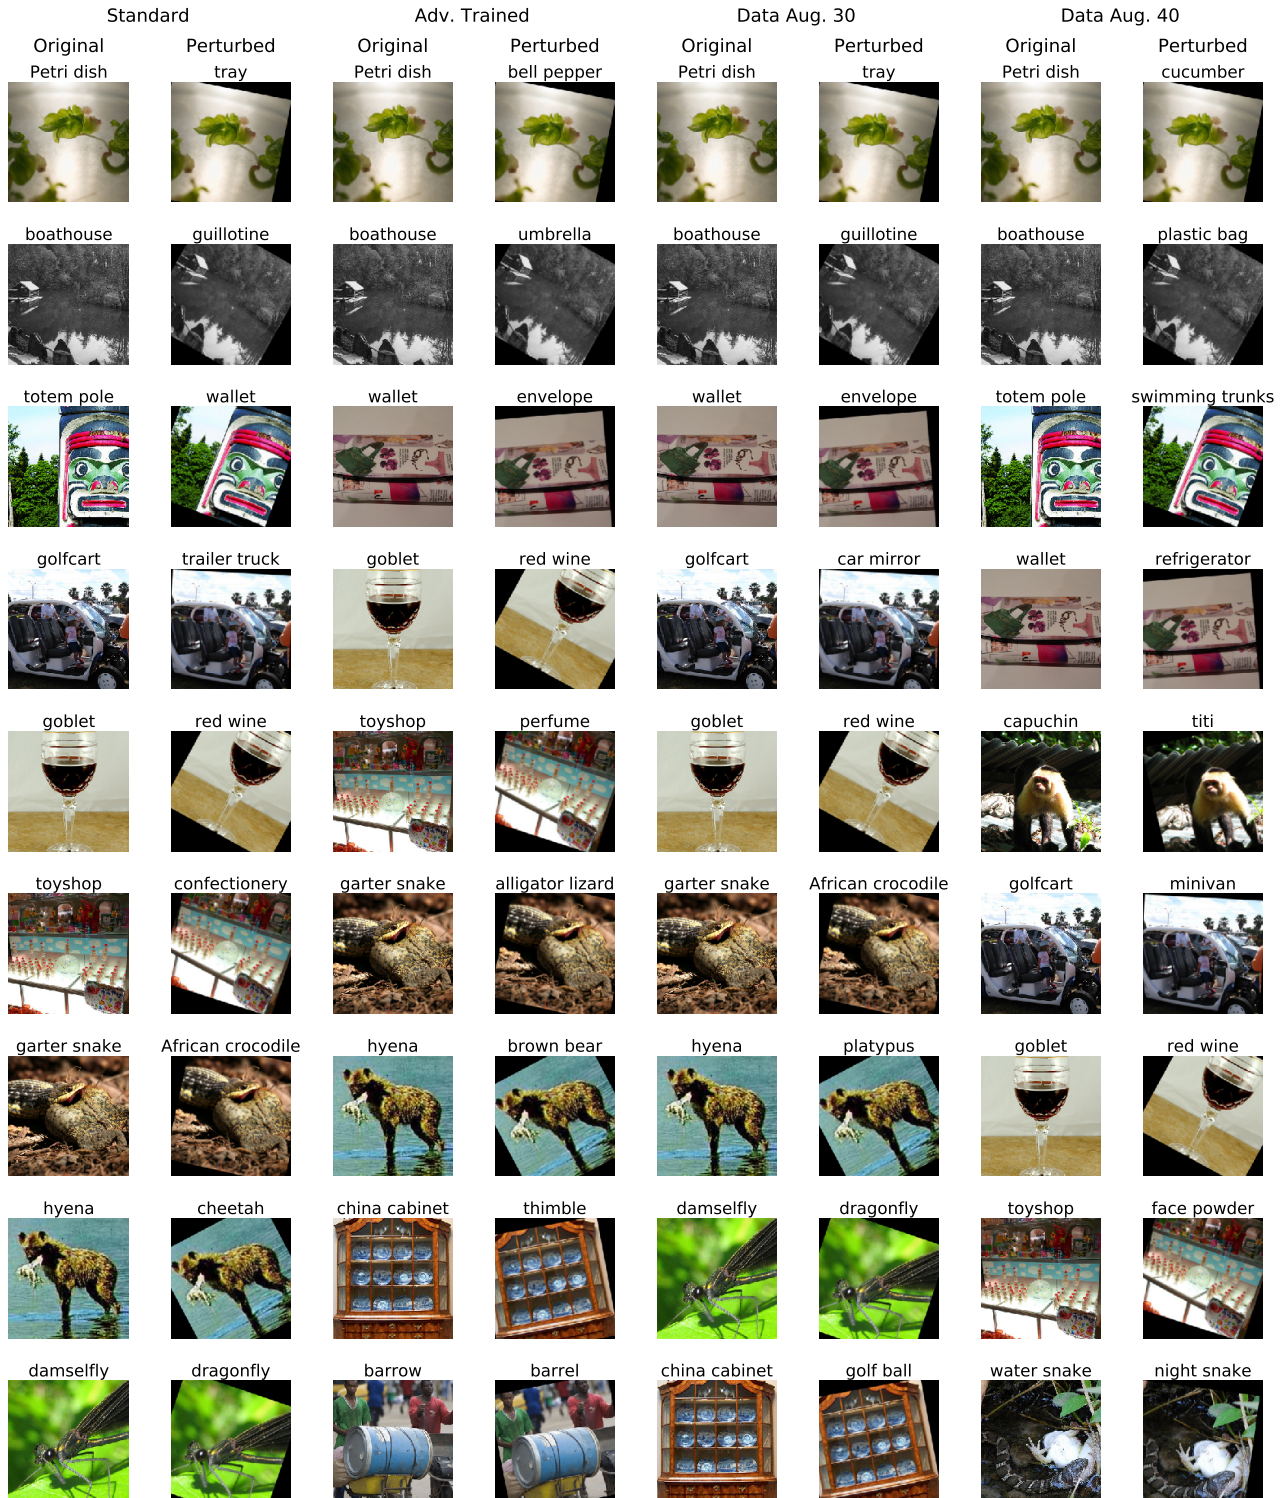

Figure 7. ImageNet. Successful adversarial examples for the models studied in Section 5. Rotations are restricted to be within  $30^\circ$  of the original and translations up to 24 pixels per directions (image size  $299 \times 299$ ). Each example is visualized along with its predicted label in the original and perturbed version.

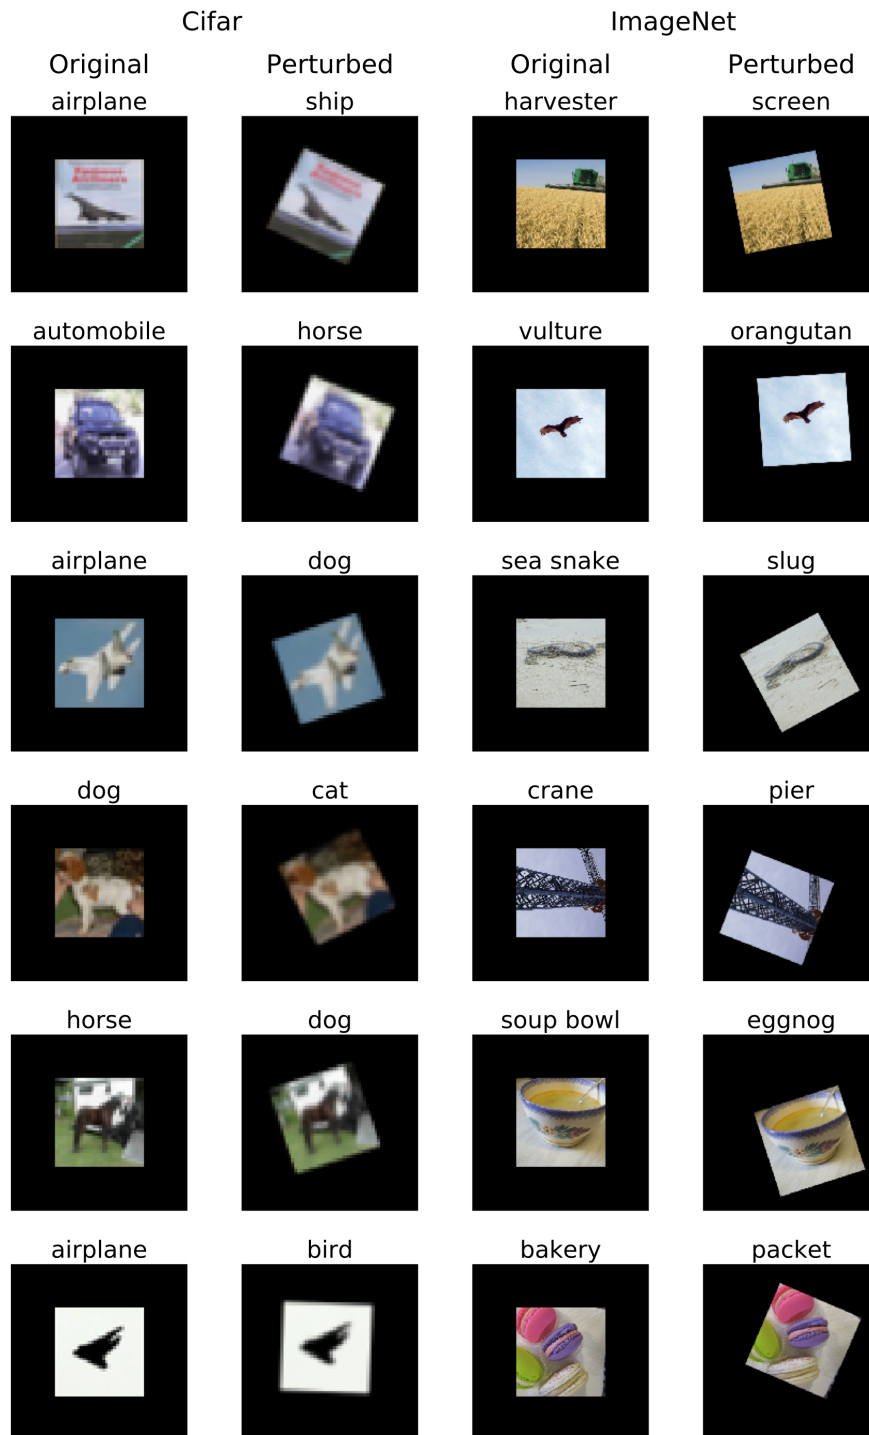

Figure 8. Sample adversarial transformations for the "black-canvas" setting for the standard models on CIFAR10 and ImageNet.

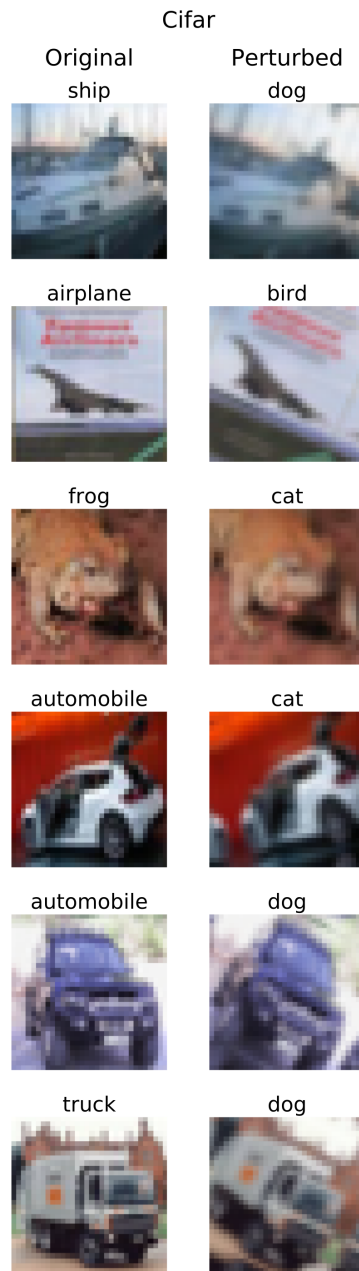

Figure 9. Sample adversarial transformations for the reflection padding setting for the standard models on CIFAR10.

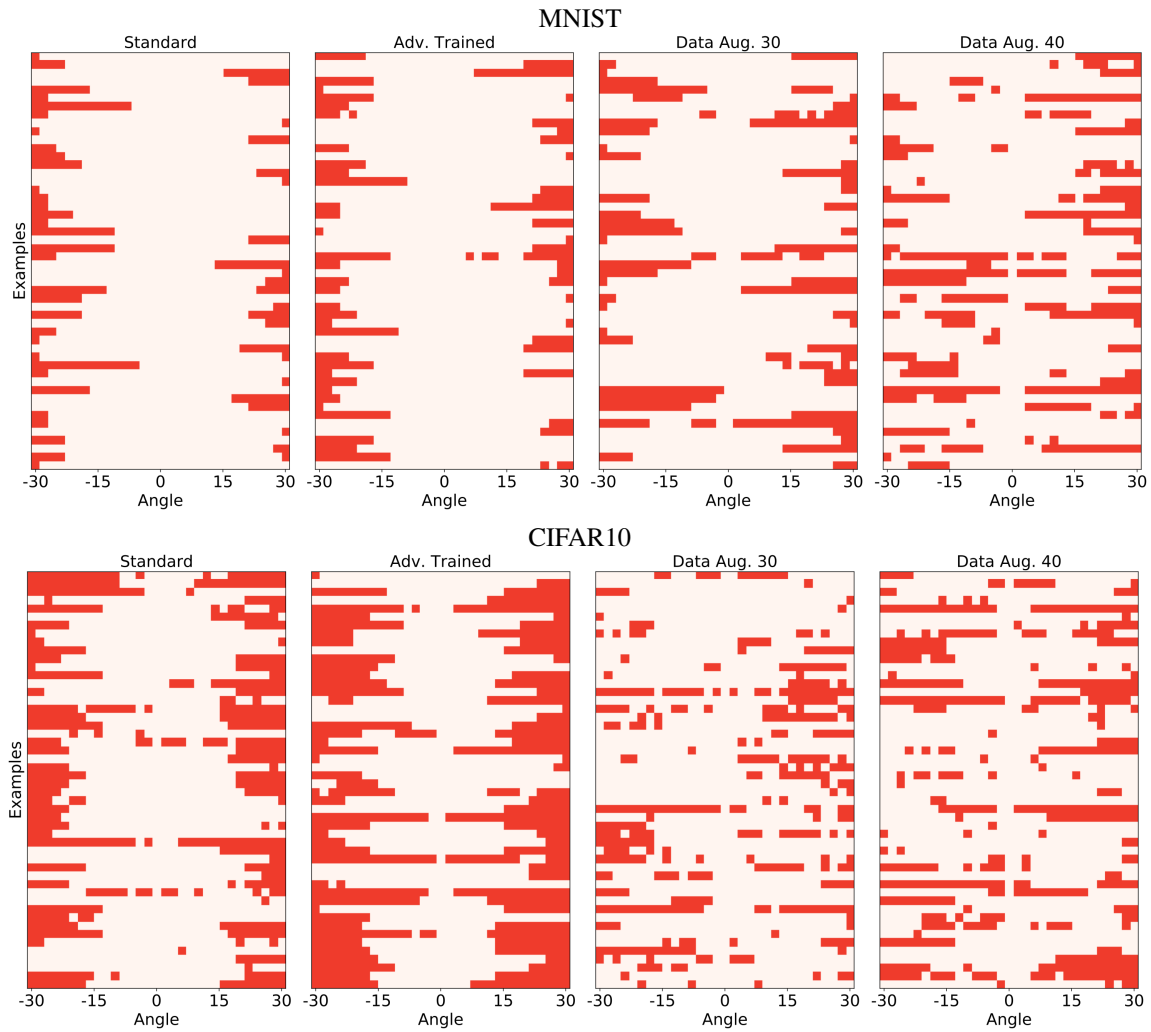

Figure 10. Visualizing which angles fool the classifier for 50 random examples on CIFAR and MNIST. For each dataset and model, we visualize one example per row. Red corresponds to *misclassification* of the images. We observe that the angles fooling the models form a highly non-convex set.

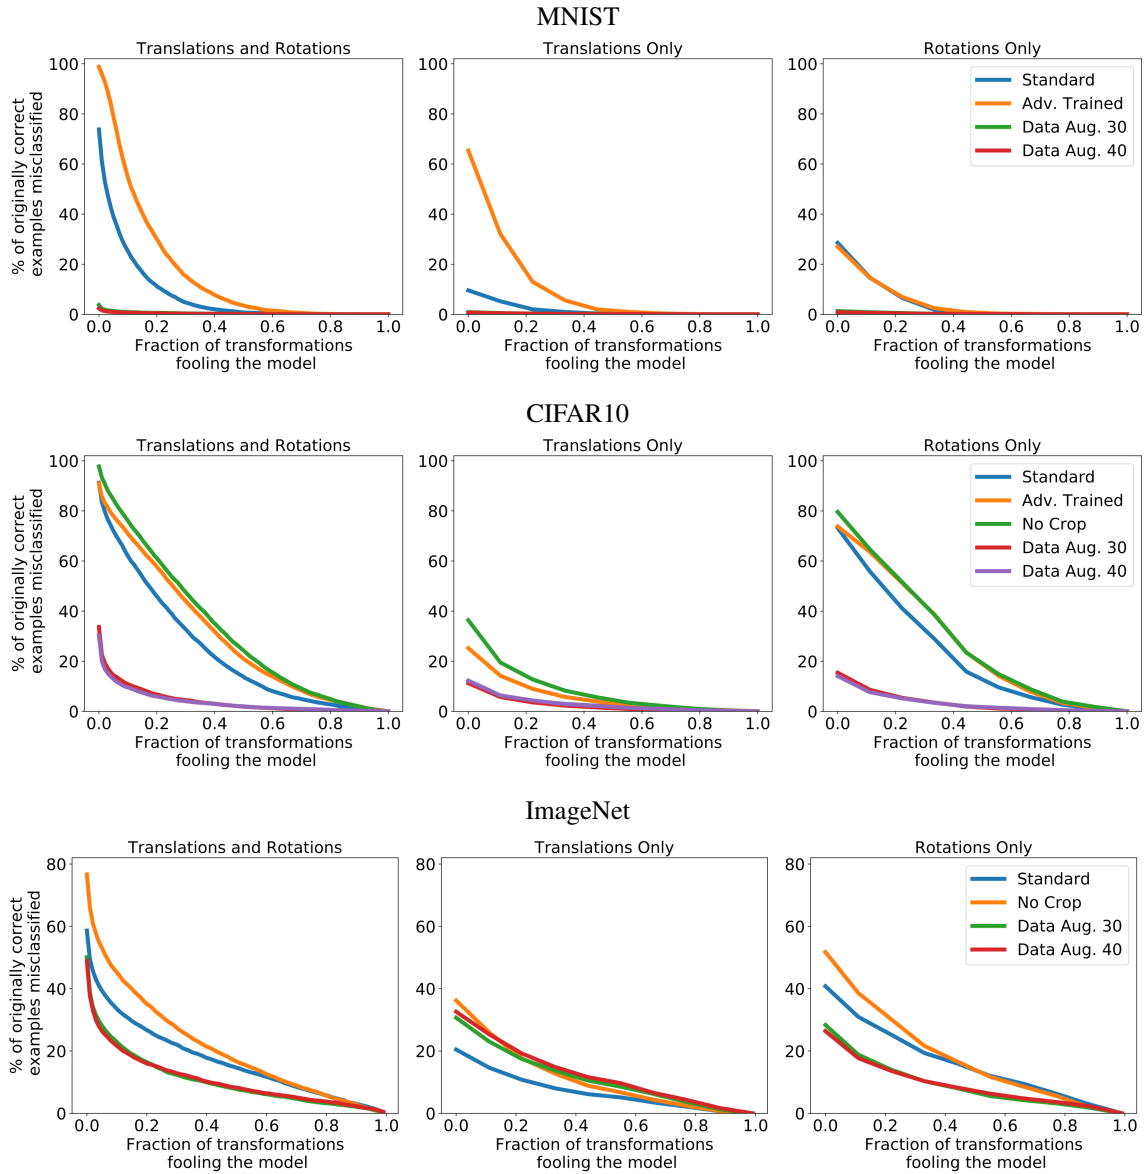

Figure 11. Cumulative Density Function plots. For each fraction of grid points  $p$ , we plot the percentage of correctly classified test set examples that are fooled by at least  $p$  of the grid points. For instance, we can see from the first plot, MNIST Translations and Rotations, that approximately 10% of the correctly classified natural examples are misclassified under  $1/5$  of the grid points transformations.

Table 3. Comparison of attack methods across datasets and models.

|                                               | Model                                          | Natural | Worst-of-10 | FO            | Grid          |
|-----------------------------------------------|------------------------------------------------|---------|-------------|---------------|---------------|
| MNIST                                         | Standard                                       | 99.31%  | 73.32%      | 79.84%        | <b>26.02%</b> |
|                                               | $\ell_\infty$ -Adversarially Trained           | 98.65%  | 51.18%      | 81.23%        | <b>1.20%</b>  |
|                                               | Aug. 30 ( $\pm 3\text{px}$ , $\pm 30^\circ$ )  | 99.53%  | 98.33%      | 98.78%        | <b>95.79%</b> |
|                                               | Aug. 40 ( $\pm 4\text{px}$ , $\pm 40^\circ$ )  | 99.34%  | 98.49%      | 98.74%        | <b>96.95%</b> |
| CIFAR10                                       | Standard                                       | 92.62%  | 20.13%      | 62.69%        | <b>2.80%</b>  |
|                                               | No Crop                                        | 90.34%  | 15.04%      | 52.27%        | <b>1.86%</b>  |
|                                               | $\ell_\infty$ -Adversarially Trained           | 80.21%  | 19.38%      | 33.24%        | <b>6.02%</b>  |
|                                               | Aug. 30 ( $\pm 3\text{px}$ , $\pm 30^\circ$ )  | 90.02%  | 79.92%      | 85.92%        | <b>58.92%</b> |
| Aug. 40 ( $\pm 4\text{px}$ , $\pm 40^\circ$ ) | 88.83%                                         | 80.47%  | 85.48%      | <b>61.69%</b> |               |
| ImageNet                                      | Standard                                       | 75.96%  | 47.83%      | 63.12%        | <b>31.42%</b> |
|                                               | No Crop                                        | 70.81%  | 35.52%      | 55.93%        | <b>16.52%</b> |
|                                               | Aug. 30 ( $\pm 24\text{px}$ , $\pm 30^\circ$ ) | 65.96%  | 50.62%      | 66.05%        | <b>32.90%</b> |
|                                               | Aug. 40 ( $\pm 32\text{px}$ , $\pm 40^\circ$ ) | 66.19%  | 51.11%      | 66.14%        | <b>33.86%</b> |

Table 4. Evaluation of a subset of Table 1 in the “black-canvas” setting (images are zero-padded to avoid cropping due to rotations and translations). The models are trained on padded images.

|          |                                                | Natural | Random | Worst-of-10 | Grid          | Trans. Grid | Rot. Grid |
|----------|------------------------------------------------|---------|--------|-------------|---------------|-------------|-----------|
| CIFAR10  | Standard                                       | 91.81%  | 70.23% | 25.51%      | <b>6.55%</b>  | 83.38%      | 12.44%    |
|          | No Crop                                        | 89.70%  | 52.86% | 14.14%      | <b>1.17%</b>  | 47.94%      | 9.46%     |
|          | Aug. 30 ( $\pm 3\text{px}$ , $\pm 30^\circ$ )  | 91.45%  | 90.82% | 80.53%      | <b>63.64%</b> | 82.28%      | 76.32%    |
|          | Aug. 40 ( $\pm 4\text{px}$ , $\pm 40^\circ$ )  | 91.24%  | 91.00% | 81.81%      | <b>66.64%</b> | 81.75%      | 78.57%    |
| ImageNet | Standard                                       | 73.60%  | 46.59% | 29.51%      | <b>15.38%</b> | 28.03%      | 23.81%    |
|          | No Crop                                        | 66.28%  | 38.70% | 14.17%      | <b>3.43%</b>  | 8.87%       | 10.97%    |
|          | Aug. 30 ( $\pm 24\text{px}$ , $\pm 30^\circ$ ) | 64.60%  | 67.75% | 47.32%      | <b>28.51%</b> | 45.33%      | 39.33%    |
|          | Aug. 40 ( $\pm 32\text{px}$ , $\pm 40^\circ$ ) | 49.20%  | 57.69% | 38.36%      | <b>22.10%</b> | 32.84%      | 32.95%    |



## Exploring the Landscape of Spatial Robustness

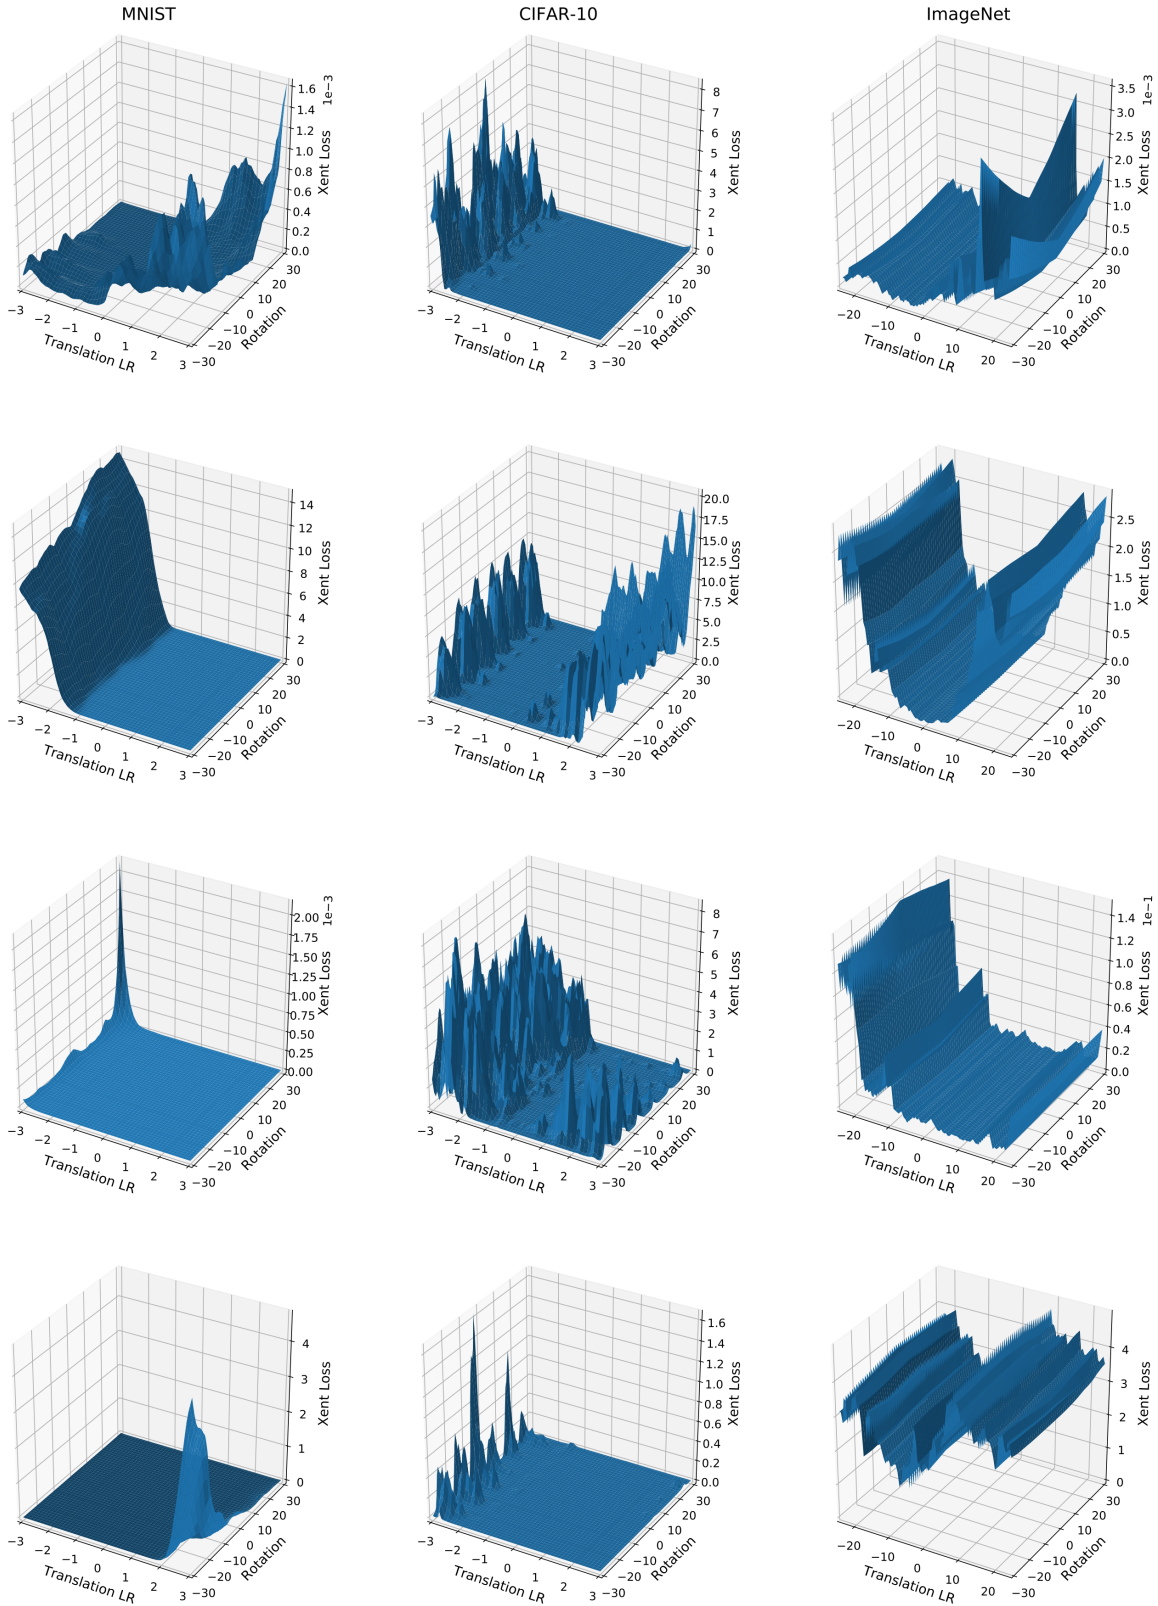

Figure 12. Loss landscape of 4 random examples for each dataset when performing left-right translations and rotations. Translations and rotations are restricted to 10% of the image pixels and  $30^\circ$  respectively. We observe that the landscape is significantly non-concave, making rendering FO methods for adversarial example generation powerless.

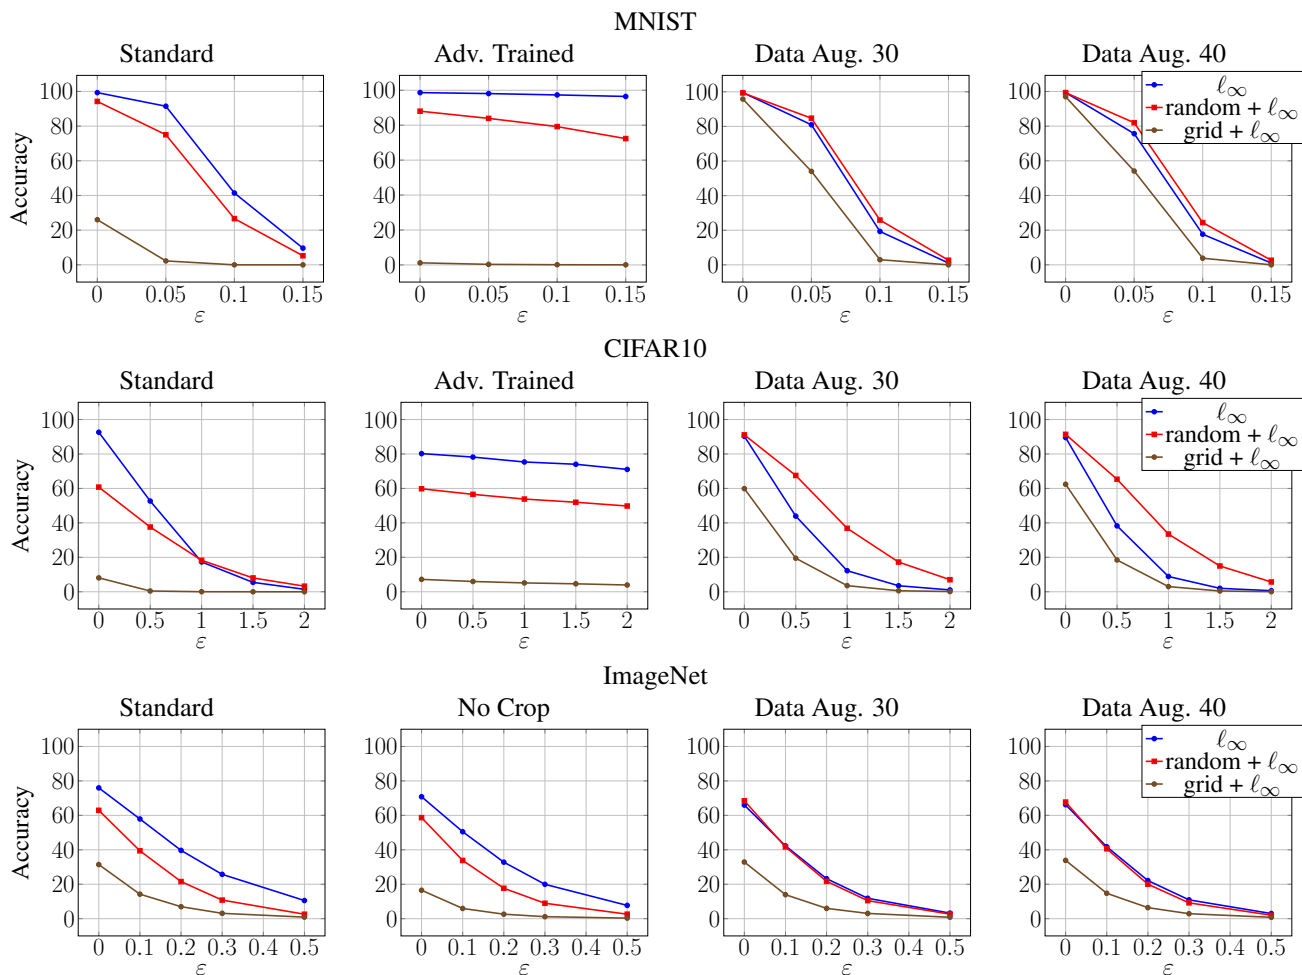

Figure 13. Accuracy of different classifiers against  $l_\infty$ -bounded adversaries with various values of  $\epsilon$  and spatial transformations. For each value of  $\epsilon$ , we perform PGD to find the most adversarial  $l_\infty$ -bounded perturbation. Additionally, we combine PGD with random rotations and translations and with a grid search over rotations and translations in order to find the transformation that combines with PGD in the most adversarial way.

## B. Mirror Padding

In the experiments of Section 5, we filled the remaining pixels of rotated and translated images with black (also known as zero or constant padding). This is the standard approach used when performing random cropping for data augmentation purposes. We briefly examined the effect of mirror padding, that is replacing empty pixels by reflecting the image around the border<sup>7</sup>. The results are shown in Table 6. We observed that training with one padding method and evaluating using the other resulted in a significant drop in accuracy. Training using one of these methods randomly for each example resulted in a model which roughly matched the best-case of the two individual cases.

<sup>7</sup>[https://www.tensorflow.org/api\\_docs/python/tf/pad](https://www.tensorflow.org/api_docs/python/tf/pad)

Table 5. Majority Defense. Accuracy of different models on the natural evaluation set and against a combined rotation and translation adversary using aggregation of multiple random transformations.

|          | Model     | Natural Acc.  |               | Grid Acc. |               |
|----------|-----------|---------------|---------------|-----------|---------------|
|          |           | Stand.        | Vote          | Stand.    | Vote          |
| MNIST    | Standard  | 99.31%        | 98.71%        | 26.02%    | 18.80%        |
|          | Aug 30.   | <b>99.53%</b> | 99.41%        | 95.79%    | 95.32%        |
|          | Aug 40.   | 99.34%        | 99.25%        | 96.95%    | 97.65%        |
|          | W-10 (30) | 99.48%        | 99.40%        | 97.32%    | 96.95%        |
|          | W-10 (40) | 99.42%        | 99.41%        | 97.88%    | <b>98.47%</b> |
| CIFAR10  | Standard  | 92.62%        | 80.37%        | 2.82%     | 7.85%         |
|          | Aug 30.   | 90.02%        | 92.70%        | 58.90%    | 69.65%        |
|          | Aug 40.   | 88.83%        | 92.50%        | 61.69%    | 76.54%        |
|          | W-10 (30) | 91.34%        | 93.38%        | 69.17%    | 77.33%        |
|          | W-10 (40) | 91.00%        | <b>93.40%</b> | 71.15%    | <b>81.52%</b> |
| ImageNet | Standard  | 75.96%        | 73.19%        | 31.42%    | 40.21%        |
|          | Aug 30.   | 65.96%        | 72.44%        | 32.90%    | 44.46%        |
|          | Aug 40.   | 66.19%        | 71.46%        | 33.86%    | 46.98%        |
|          | W-10 (30) | <b>76.14%</b> | 74.92%        | 52.76%    | <b>56.45%</b> |
|          | W-10 (40) | 74.64%        | 73.38%        | 50.23%    | 56.23%        |

|                | Natural | Random<br>(Zero) | Random<br>(Mirror) | Grid Search<br>(Zero) | Grid Search<br>(Mirror) |
|----------------|---------|------------------|--------------------|-----------------------|-------------------------|
| Standard Nat   | 92.62%  | 60.76%           | 66.42%             | 8.08%                 | 5.37%                   |
| Standard Adv   | 80.21%  | 59.79%           | 67.12%             | 7.20%                 | 12.89%                  |
| Aug. A, Zero   | 90.25%  | 91.09%           | 87.67%             | 59.87%                | 40.55%                  |
| Aug. B, Zero   | 89.55%  | 91.40%           | 87.94%             | 62.42%                | 42.37%                  |
| Aug. A, Mirror | 92.25%  | 88.43%           | 91.05%             | 41.46%                | 53.95%                  |
| Aug. B, Mirror | 92.03%  | 88.58%           | 91.34%             | 45.44%                | 57.97%                  |
| Aug. A, Both   | 91.80%  | 90.98%           | 91.28%             | 56.95%                | 52.60%                  |
| Aug. B, Both   | 91.57%  | 91.87%           | 91.11%             | 60.46%                | 56.13%                  |

Table 6. CIFAR10: The effect of using reflection or zero padding when training a model. The experimental setup matches that of Section 5. Zero padding refers to filling the empty pixels caused by translations and rotations with black. Mirror padding corresponds to using a reflection of the images. "Both" refers to training using both methods and alternating randomly between them for each training example.
